# Supplementary material
Source: PubMed Central journal article supplement (PMC8211092)

# Negatives: No antibody or DAPI staining (Salivary Gland)

Green-405nm laser (410-497 nm emission)

Blue-488 nm laser, (493-634nm emission)

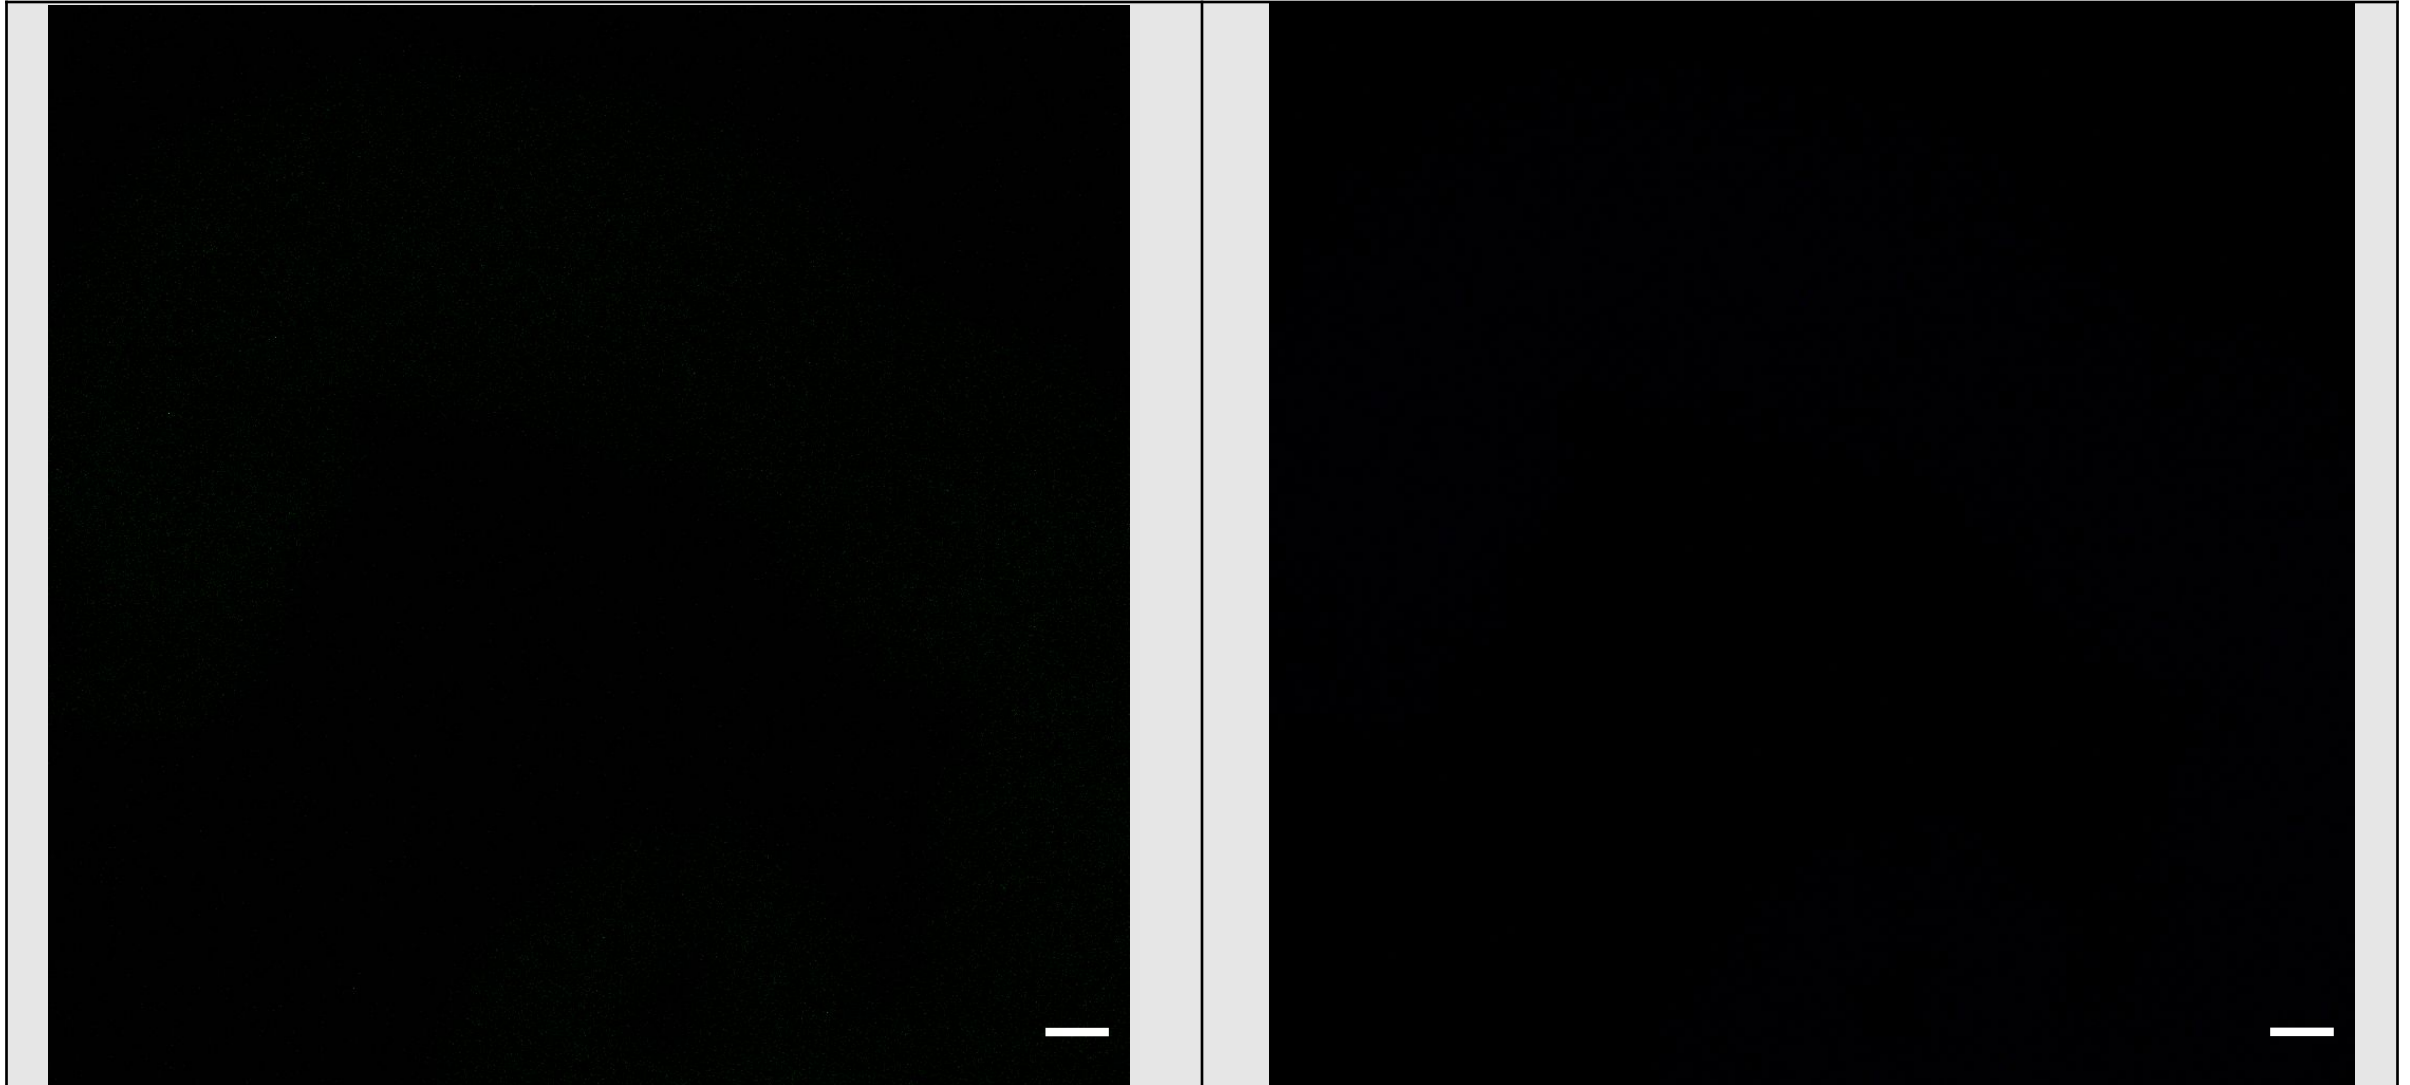

# Negatives: No antibody or DAPI staining (Gut)

Green-405nm laser (410-497 nm emission)

Blue-488 nm laser, (493-634nm emission)

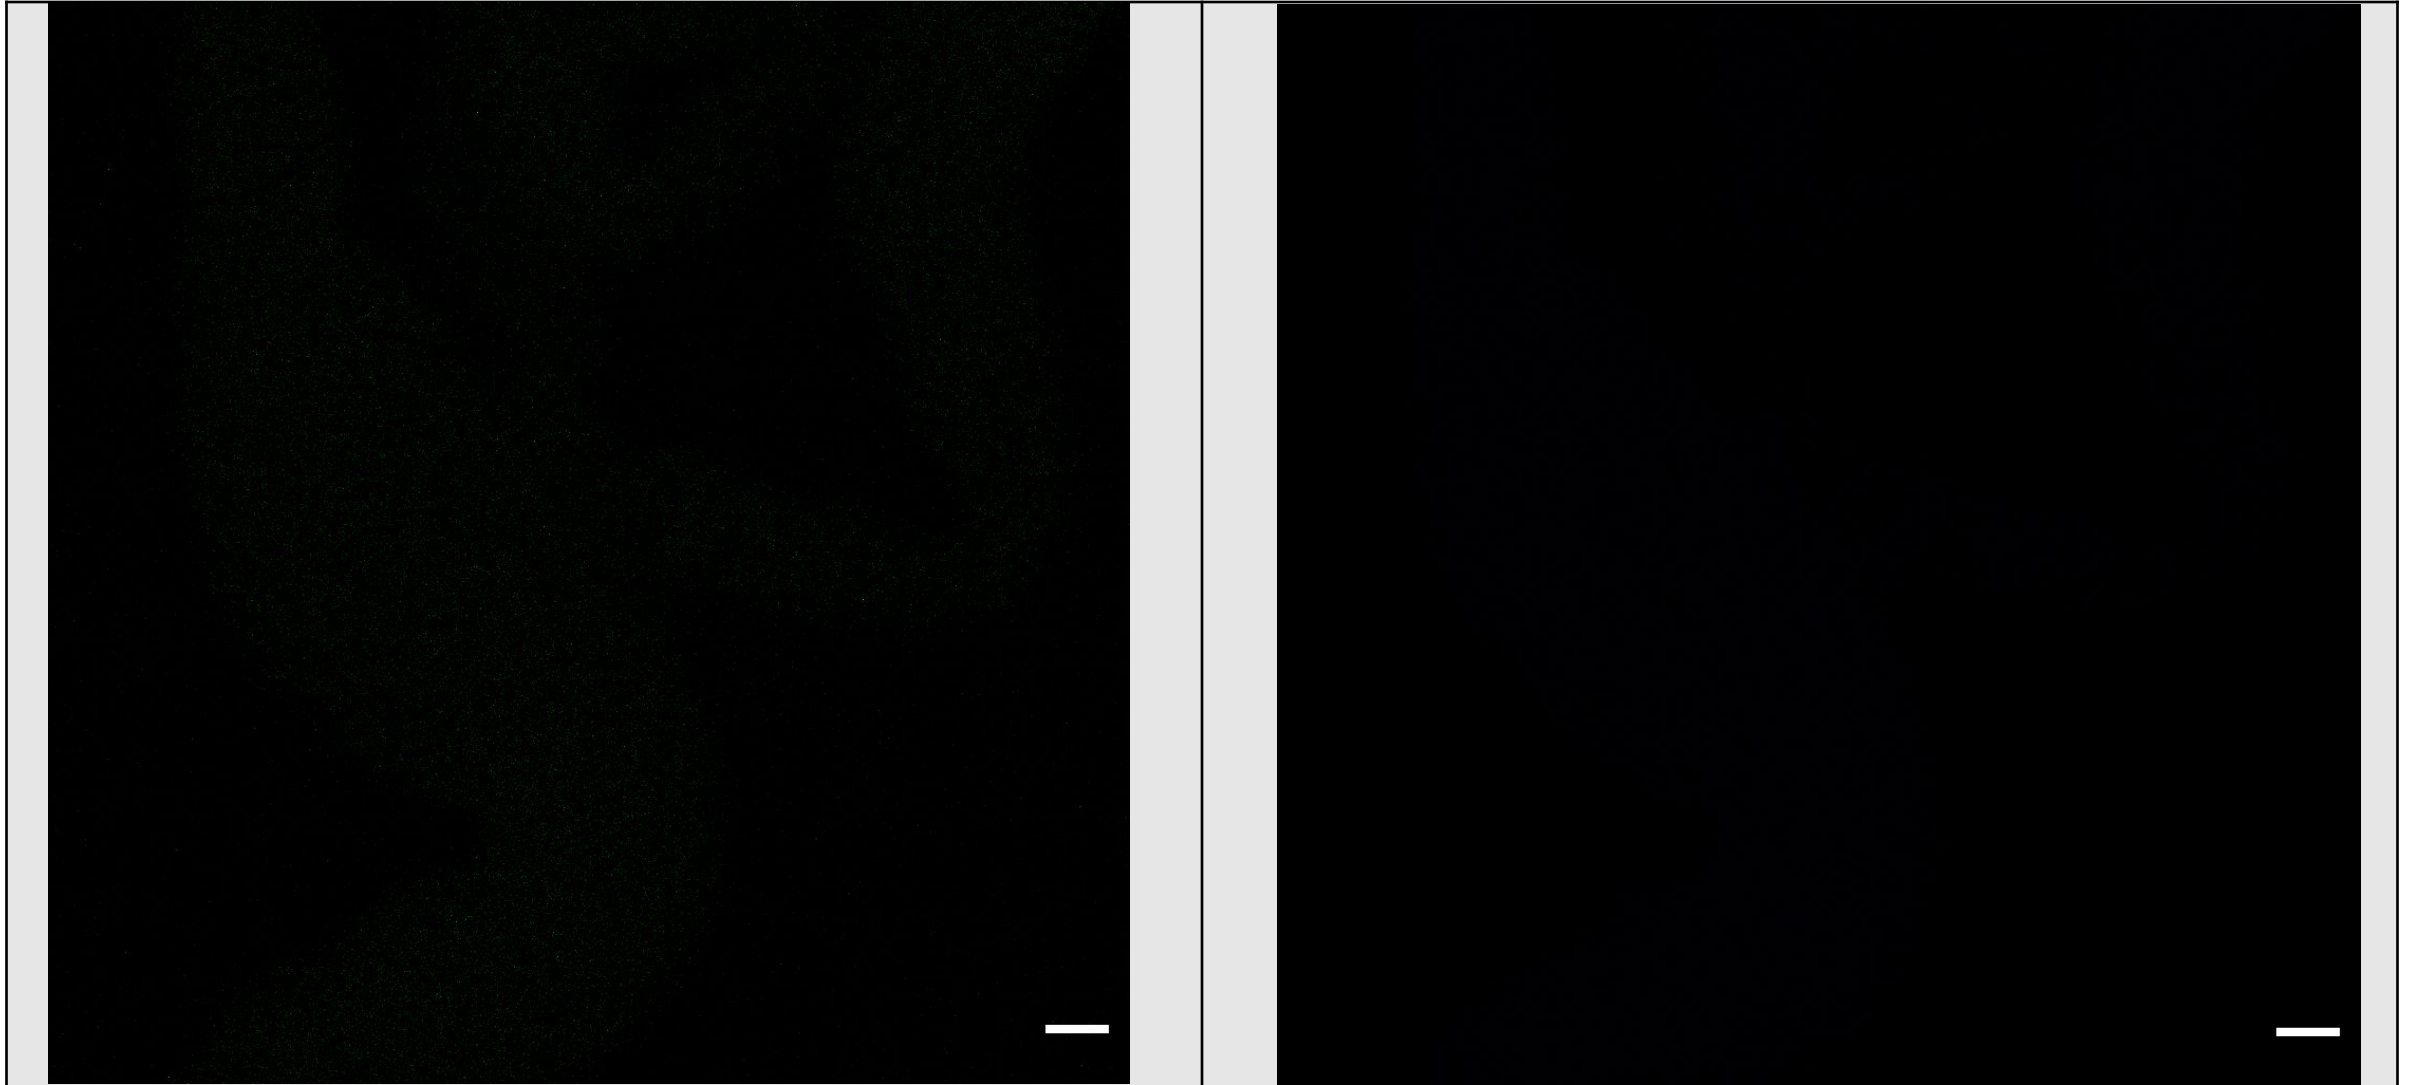

# Negatives: No Antibody or DAPI staining (Body wall)

Green-405nm laser (410-497 nm emission)

Blue-488 nm laser, (493-634nm emission)

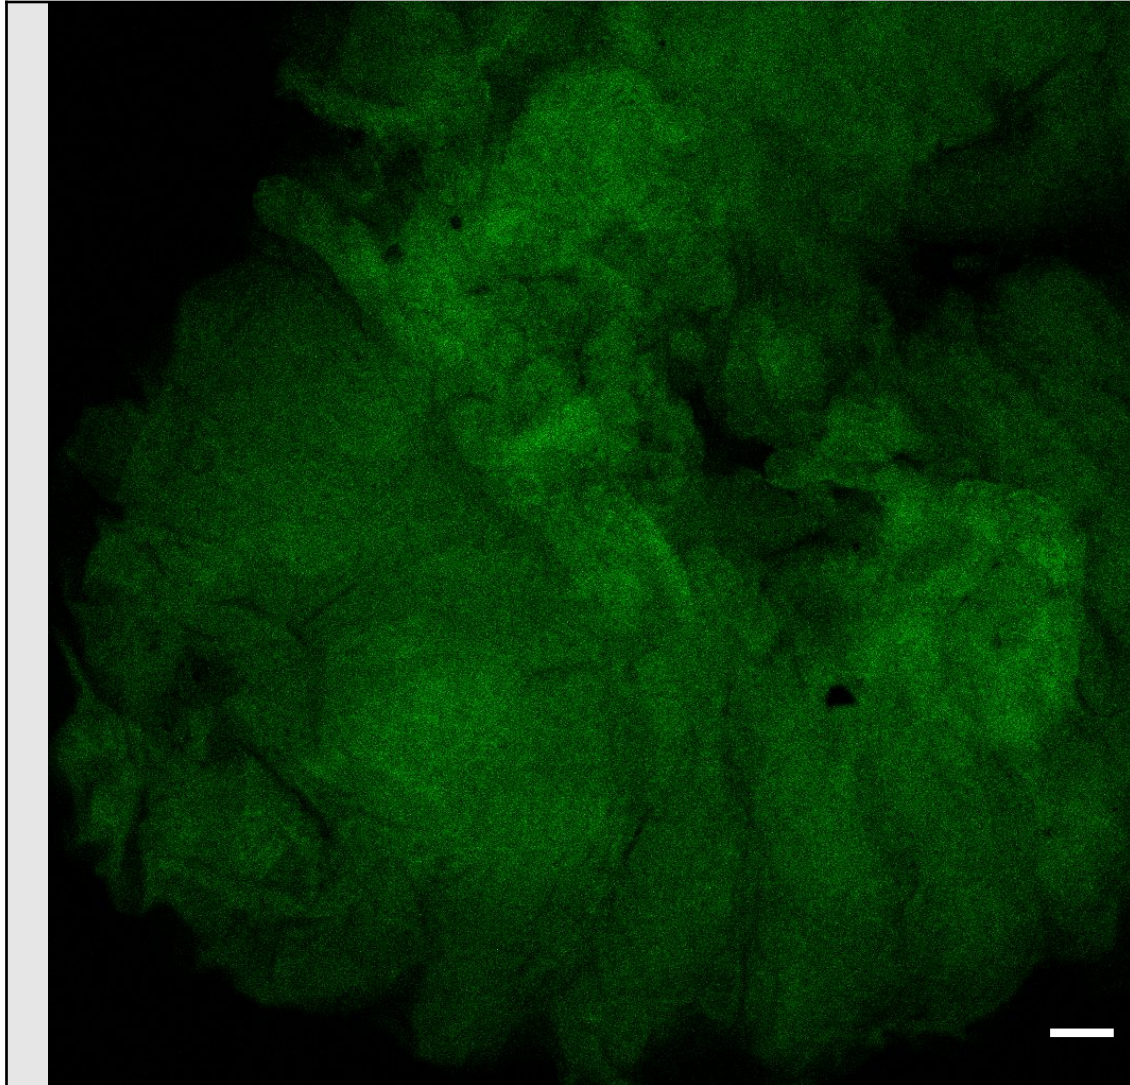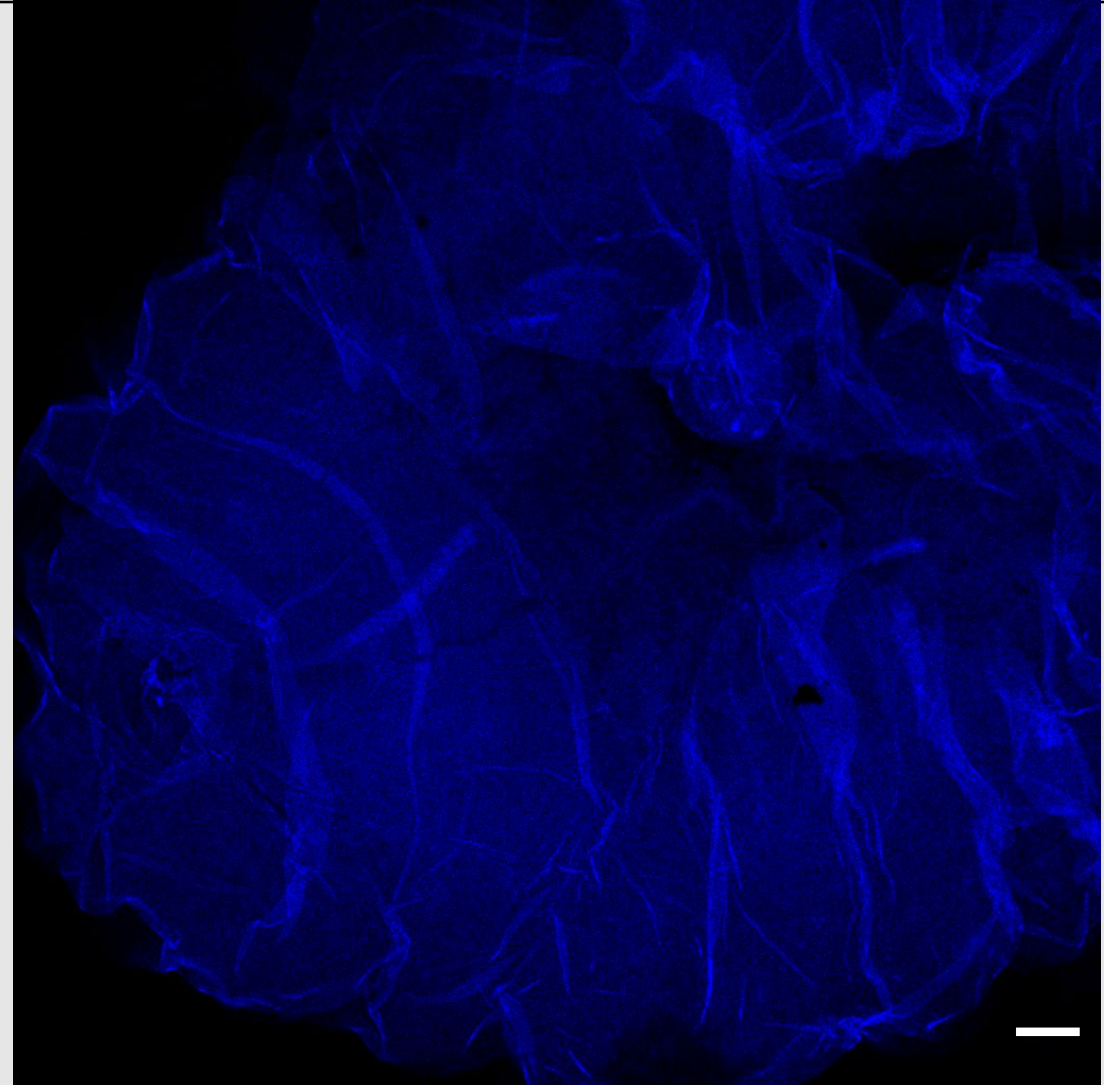

# Negatives: Primary antibody only (Salivary Gland)

Green-405nm laser (410-497 nm emission)

iPR

tZR

IAA

**b**

**c**

**d**

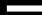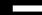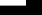

# Negatives: Primary antibody only (Gut)

Green-405nm laser (410-497 nm emission)

iPR

tZR

IAA

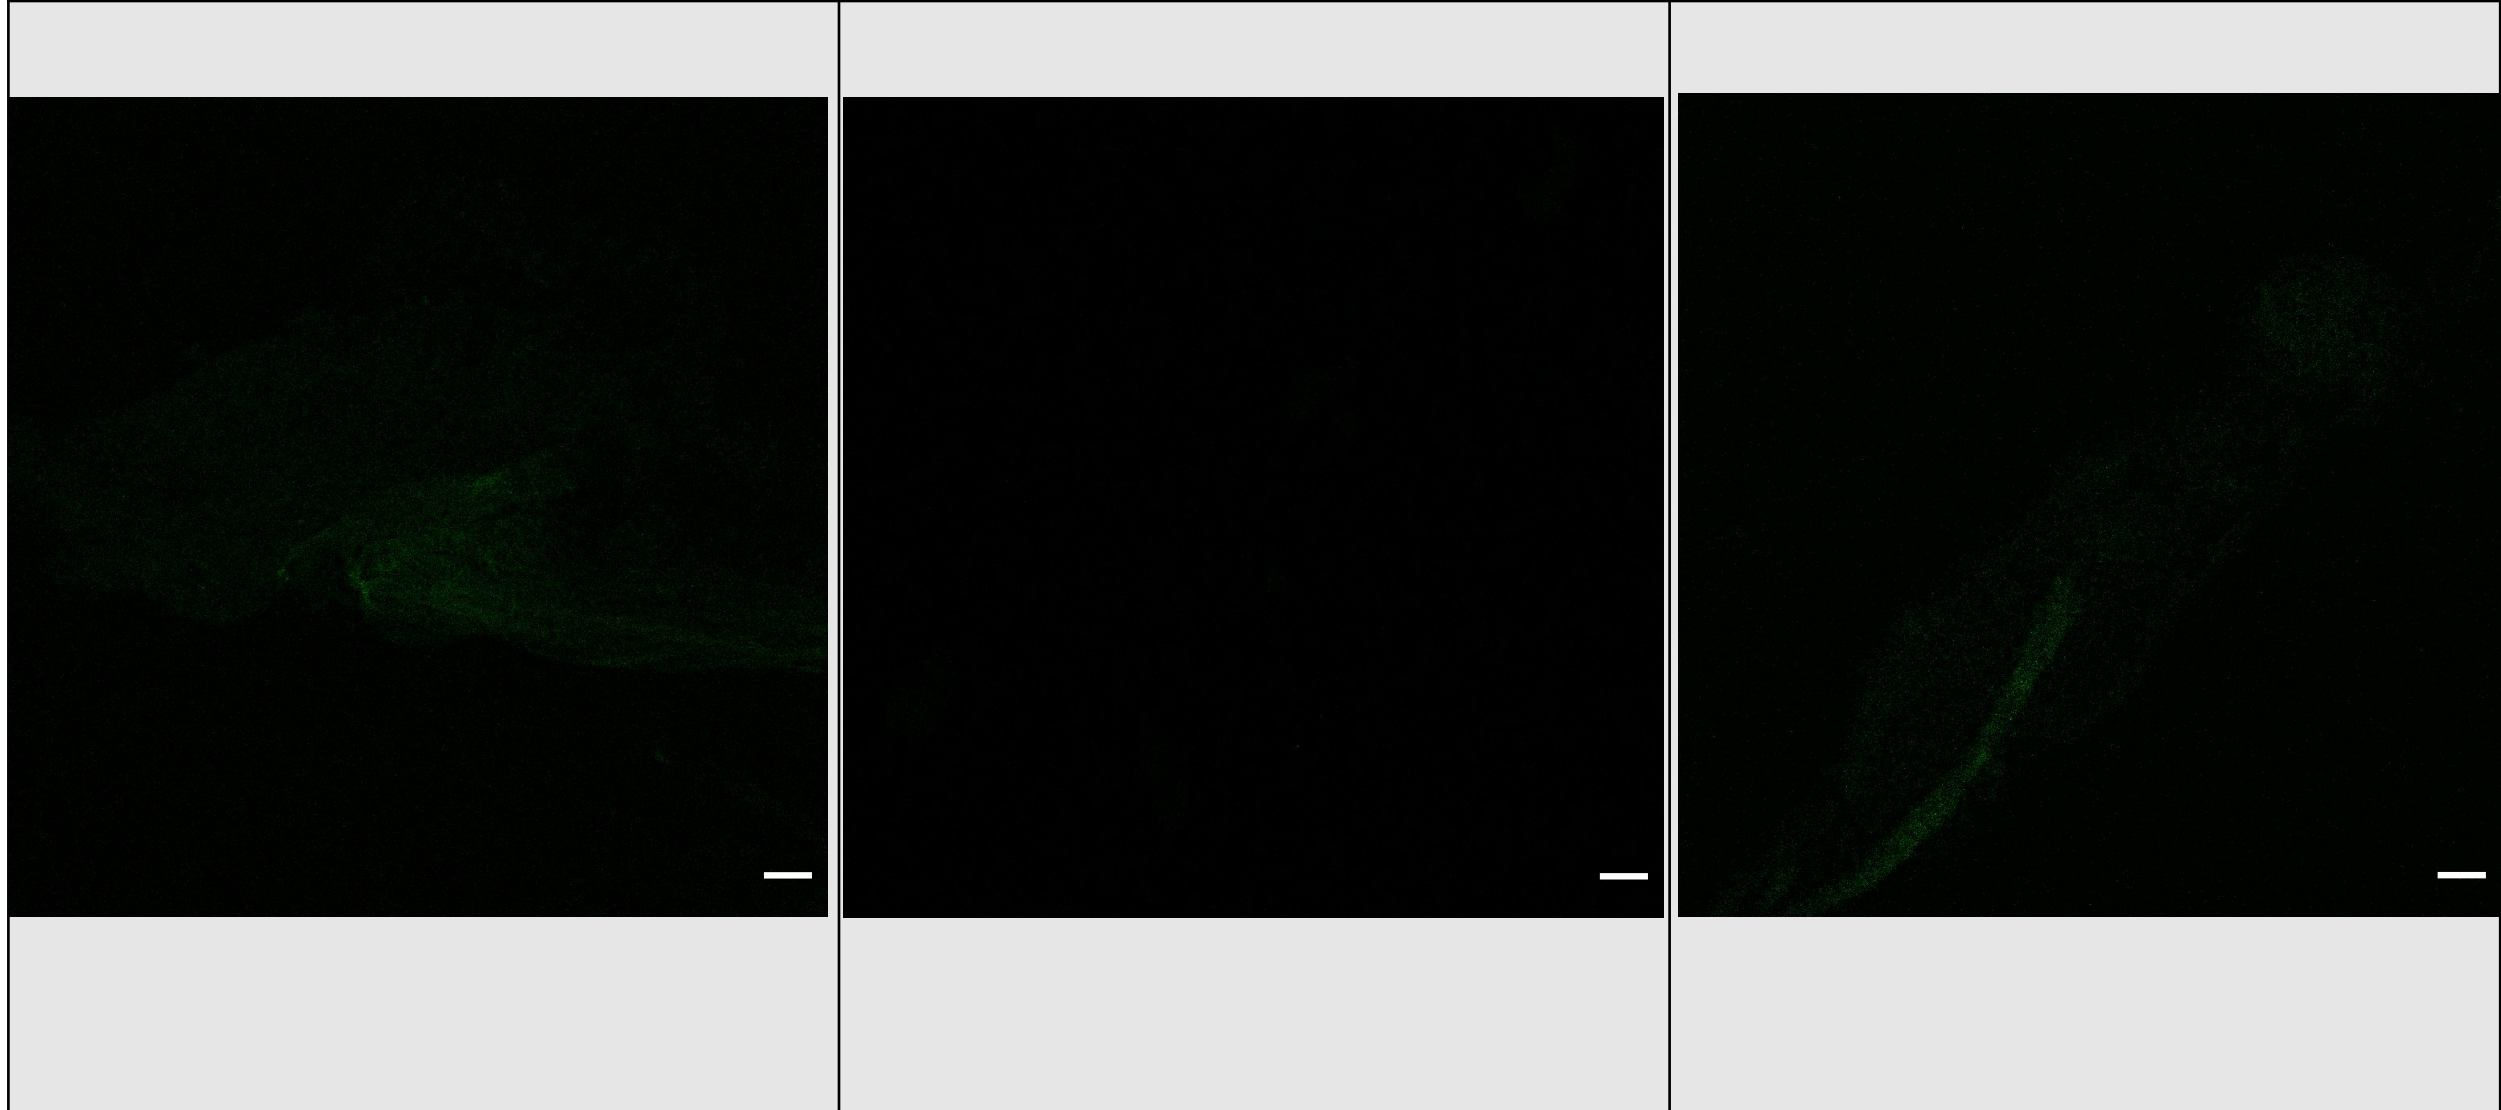

# Negatives: Primary antibody only (Body wall)

Green-405nm laser (410-497 nm emission)

iPR

tZR

IAA

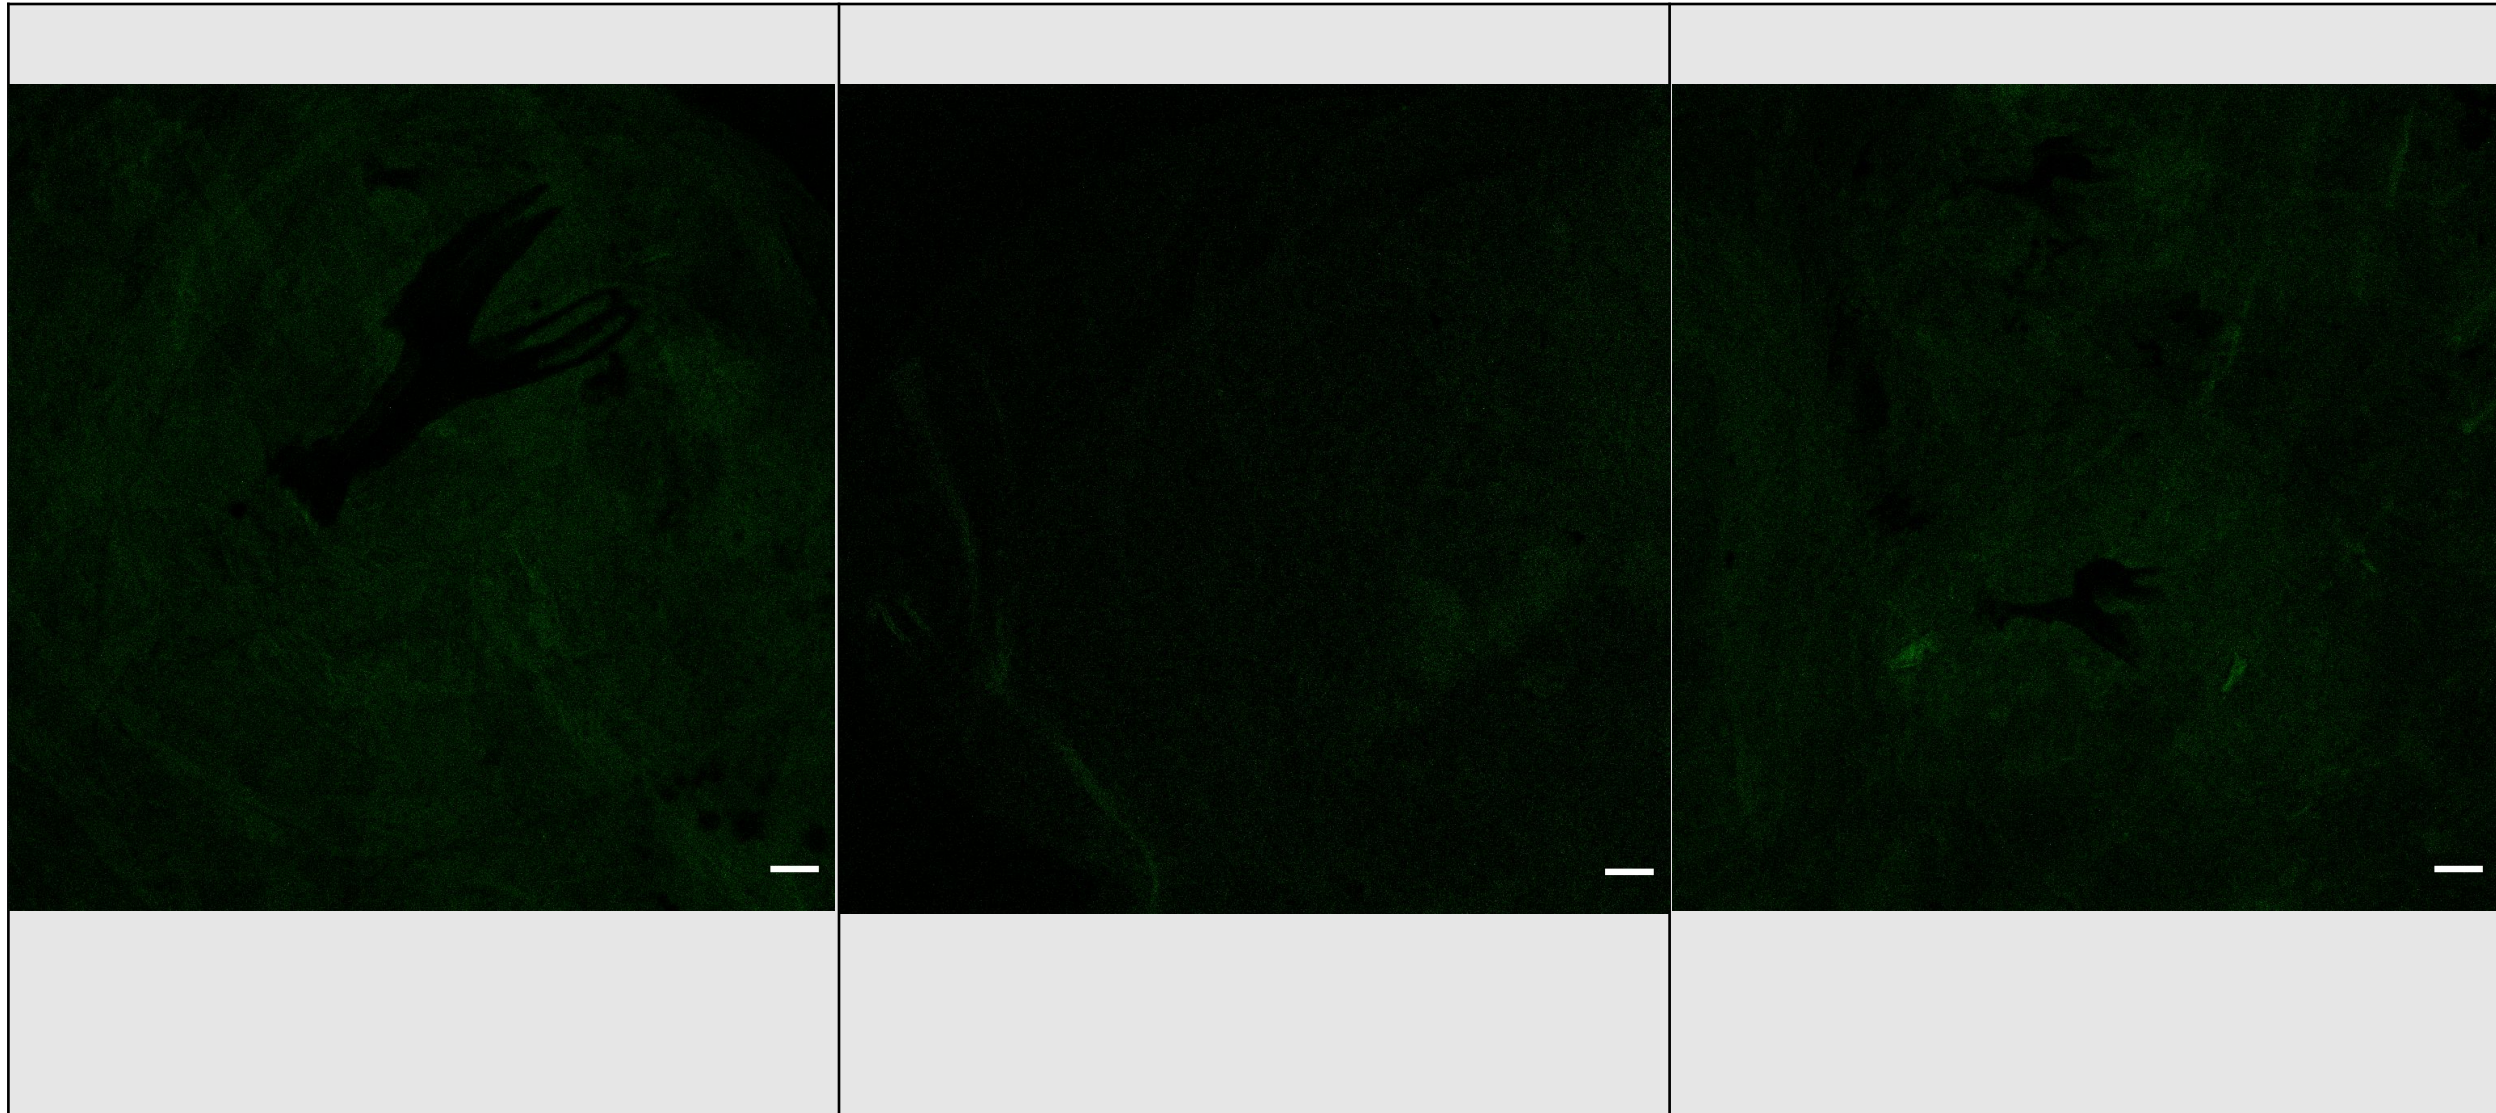

# Negatives: Secondary Antibody Only

Green-405nm laser (410-497 nm emission)

Salivary

Gut

Body Wall

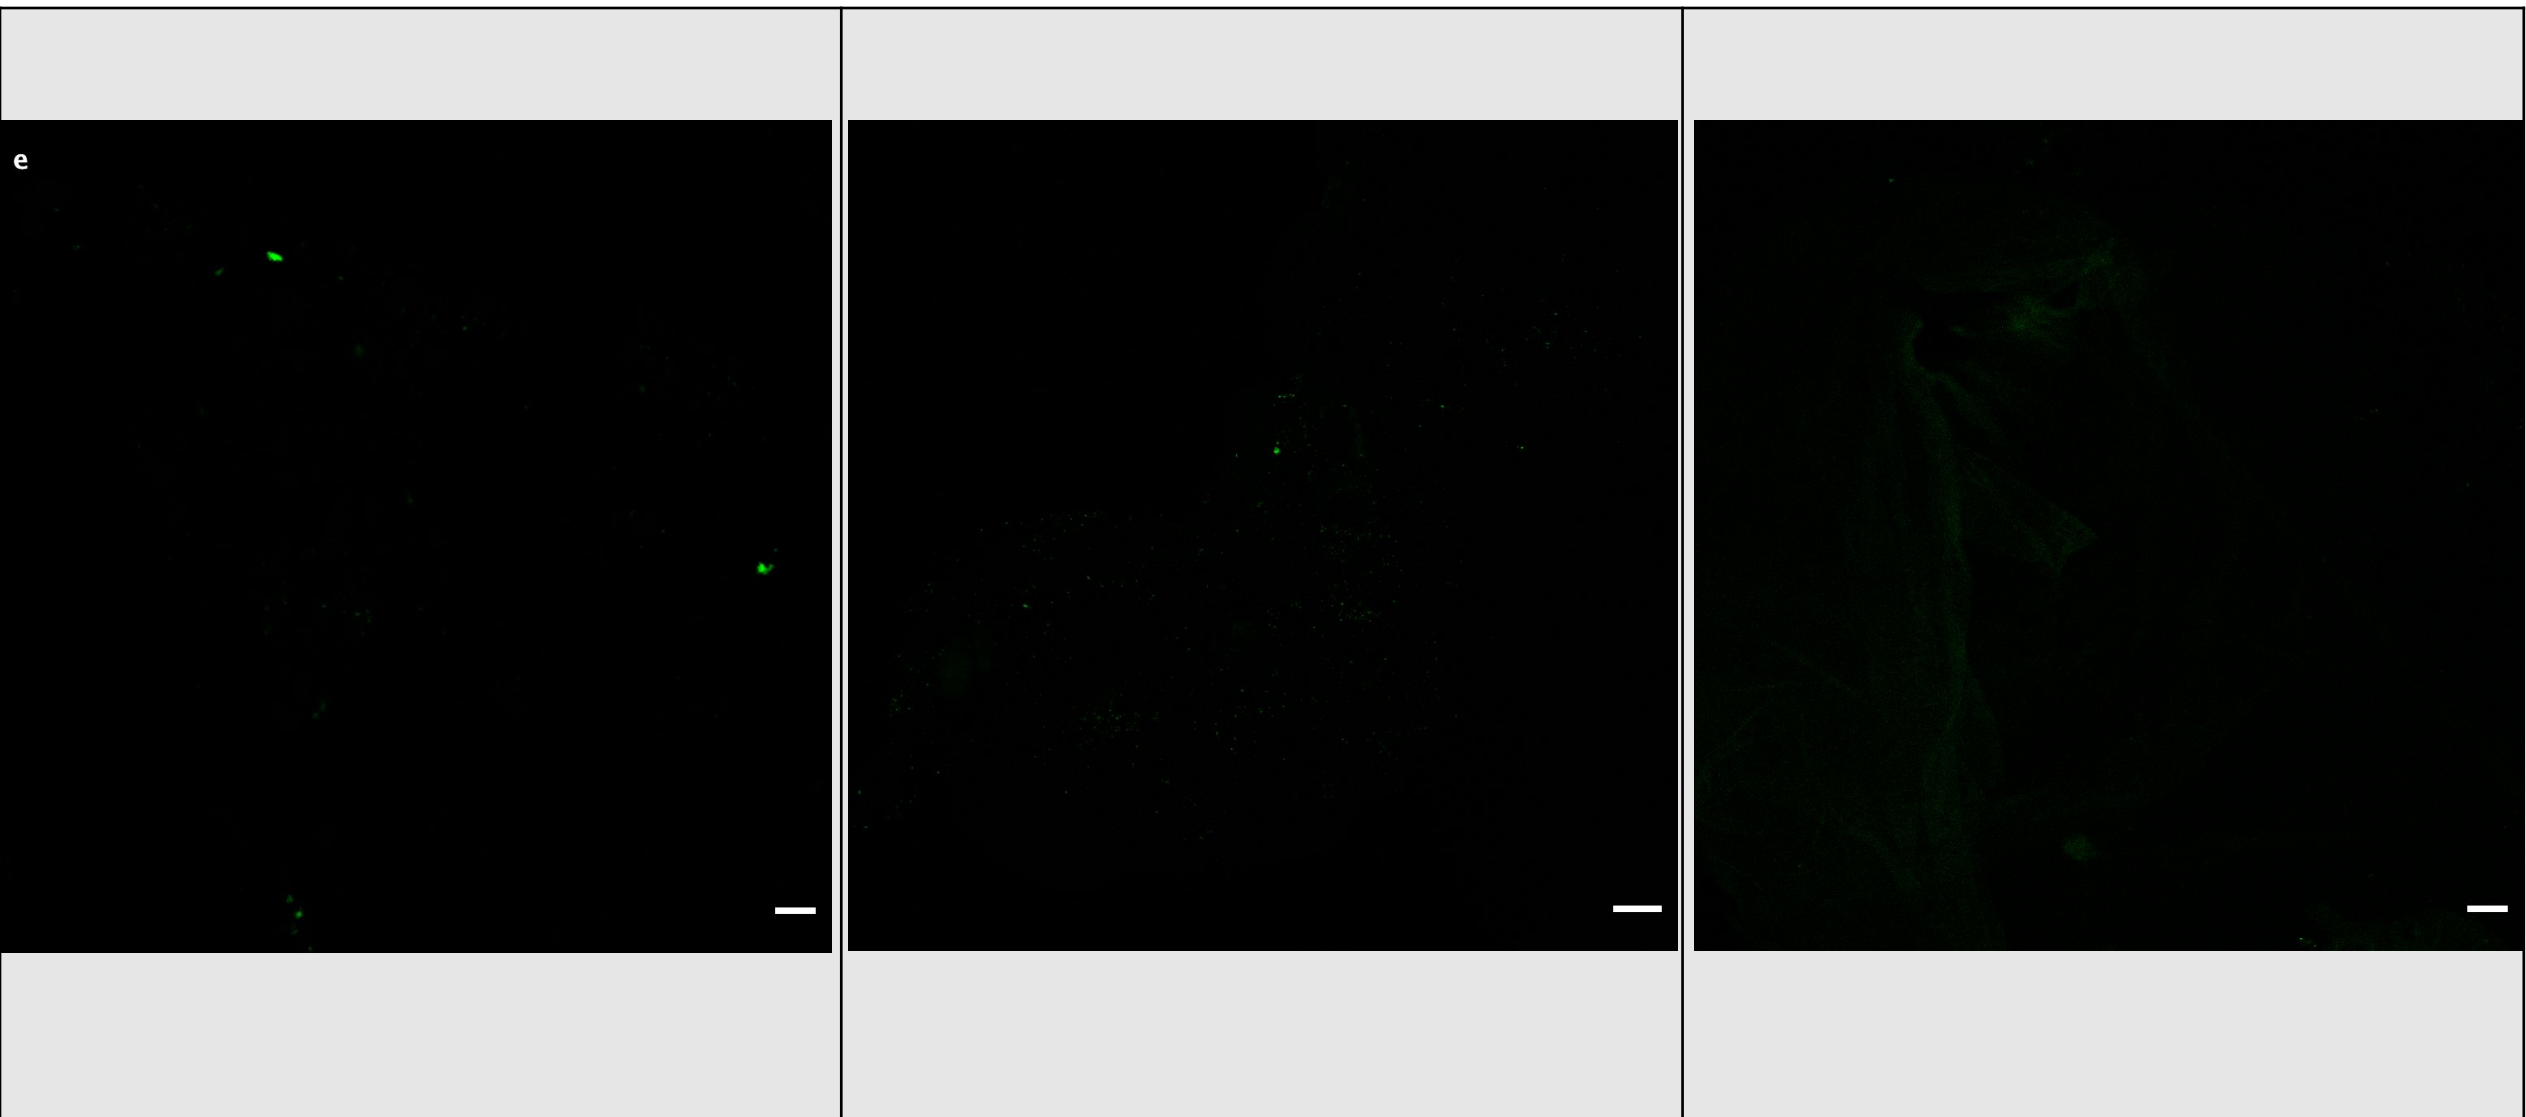

Supplement: NIHMS1689288-supplement-1689288_Supp_Info5.pdf [file NIHMS1689288-supplement-1689288_Supp_Info5.pdf]
