# Supplementary material
Source: PubMed Central journal article supplement (PMC8211092)

DAPI

FITC

Combo (DAPI+FITC)

Body wall

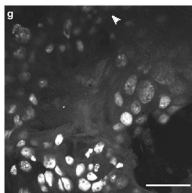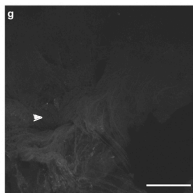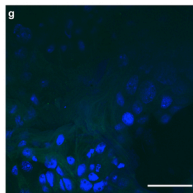

Salivary

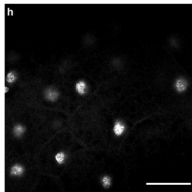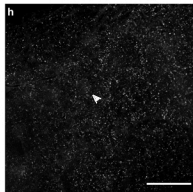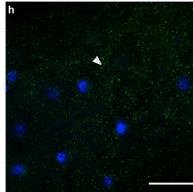

Gut

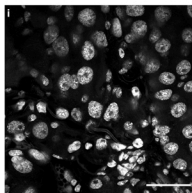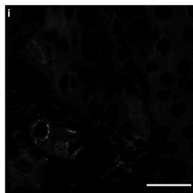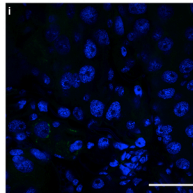

Supplement: NIHMS1689288-supplement-1689288_Supp_Info1.pdf [file NIHMS1689288-supplement-1689288_Supp_Info1.pdf]

DAPI

FITC

Combo (DAPI+FITC)

Body wall

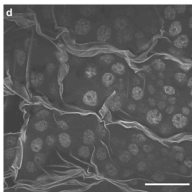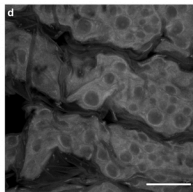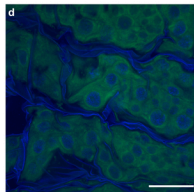

Salivary

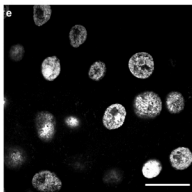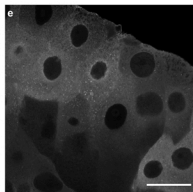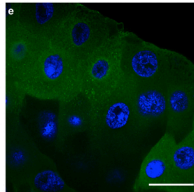

Gut

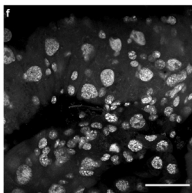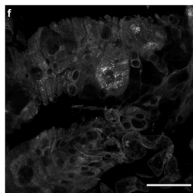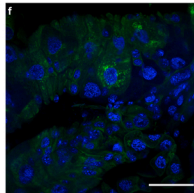

Supplement: NIHMS1689288-supplement-1689288_Supp_Info2.pdf [file NIHMS1689288-supplement-1689288_Supp_Info2.pdf]

DAPI

FITC

Combo (DAPI+FITC)

Body wall

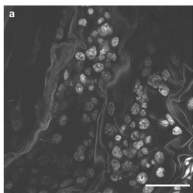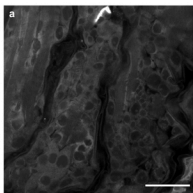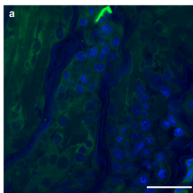

Salivary

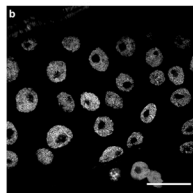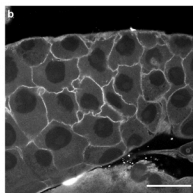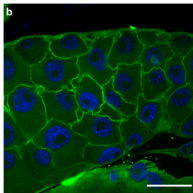

Gut

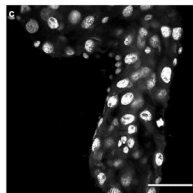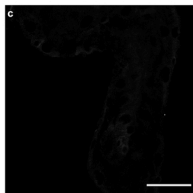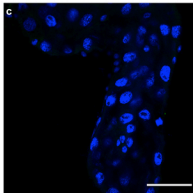

Supplement: NIHMS1689288-supplement-1689288_Supp_Info3.pdf [file NIHMS1689288-supplement-1689288_Supp_Info3.pdf]
